# Supplementary material
Source: Springer Nature journal article supplement (https://www.springermedizin.de/resource/supplementary/12885_2012_3507_MOESM3_ESM.pdf/9463548)

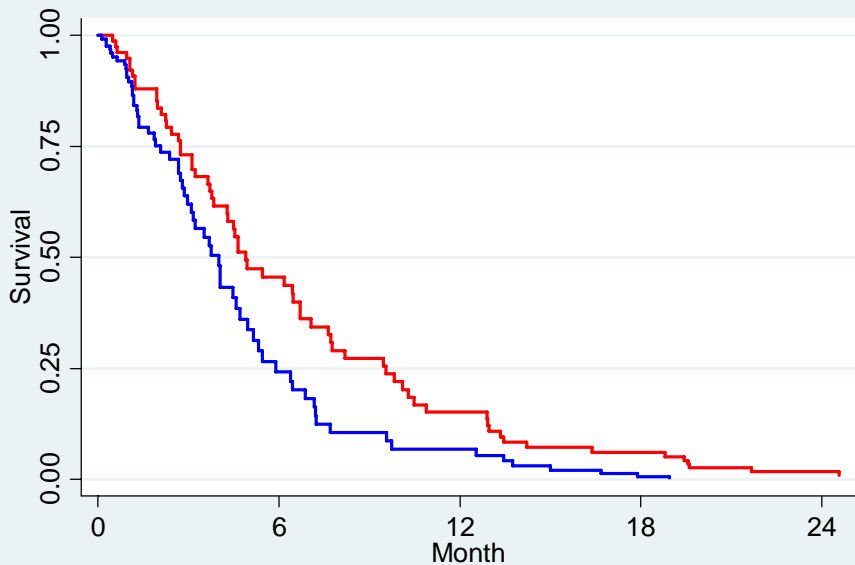

Number at risk

|          |    |    |    |   |   |
|----------|----|----|----|---|---|
| ≤ 4.3 cm | 66 | 30 | 10 | 4 | 1 |
| > 4.3 cm | 66 | 16 | 5  | 0 |   |

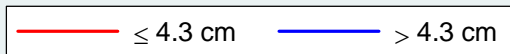

Supplement: MOESM3 [file 9463548]
